# Supplementary material for: Live attenuated vaccines and layered defense strategies to combat infections caused by nonencapsulated Yersinia pestis
Source: Frontiers journal article supplement (doi:10.3389/fbrio.2023.1240698), 2023-09-22
Supplement: Table_2.XLSX [file Table_2.XLSX]

## Sheet: IgG
Antigen	Vaccination regimen	KPhos (Grp 1)	CO92 pgm-pPst- x1 (Grp 2)	CO92 pgm-pPst- x2 (21 Day) (Grp 3)	CO92 pgm-pPst- x2 (46 Day) (Grp 4)	CO92 pgm-pPst- x2 (90 Day) (Grp 5)	CO92 pgm-pPst- x2(46 Day); rF1V (90Day) (Grp 6)	CO92 pgm-pPst- x1; F1V (Day 90) (Grp 7)	CO92 pgm-pPst- x1; CO92 ∆yscN (Day 90) (Grp8)	CO92 ∆yscN x2 (Day 45) (Grp 9)	CO92 ∆yscN x2 (Day 90) (Grp 10)	CO92 ∆yscN x1; rF1V (Day 90) (Grp 11)	CO92 ∆yscN x2 (46 Day); rF1V (Day 90) (Grp 12)
Y. pestis TS CO92	n	4	4	5	5	5	5	5	5	5	5	5	5
	Median (Min, Max)	50 ( 50 , 50 )	29,867 ( 21,333 , 51,200 )	80,000 ( 40,000 , 160,000 )	160,000 ( 40,000 , 640,000 )	320,000 ( 320,000 , 1,280,000 )	320,000 ( 80,000 , 640,000 )	1,280,000 ( 640,000 , 2,560,000 )	640,000 ( 160,000 , 853,333 )	213,333 ( 20,000 , 320,000 )	160,000 ( 80,000 , 640,000 )	3,200,000 ( 1,280,000 , 5,120,000 )	160,000 ( 20,000 , 320,000 )
	GEO Mean (GSE)	50 ( 1.00 )	30,444 ( 1.22 )	80,000 ( 1.36 )	160,000 ( 1.63 )	485,029 ( 1.32 )	305,549 ( 1.47 )	1,167,005 ( 1.27 )	485,029 ( 1.33 )	145,876 ( 1.67 )	201,587 ( 1.44 )	2,799,007 ( 1.25 )	139,288 ( 1.66 )
	Wilcoxon vs. Grp 2 : CO92 pgm-pPst- x1	0.0286
	Wilcoxon vs. Grp 3 : CO92 pgm-pPst- x2 (21 Day)	0.0079	0.0556
	Wilcoxon vs. Grp 4 : CO92 pgm-pPst- x2 (46 Day)	0.0159	0.0317	0.373
	Wilcoxon vs. Grp 5 : CO92 pgm-pPst- x2 (90 Day)	0.0079	0.0079	0.0079	0.1429
	Wilcoxon vs. Grp 6 : CO92 pgm-pPst- x2 (46 Day); rF1V (90Day)	0.0159	0.0159	0.0397	0.4127	0.5238
	Wilcoxon vs. Grp 7 : CO92 pgm-pPst- x1; F1V (Day 90)	0.0159	0.0159	0.0079	0.0159	0.0714	0.0238
	Wilcoxon vs. Grp 8 : CO92 pgm-pPst- x1; CO92 ∆yscN (Day 90)	0.0159	0.0159	0.0238	0.1111	0.8254	0.3889	0.0556
	Wilcoxon vs. Grp 9 : CO92 ∆yscN x2 (Day 45)	0.0159	0.1746	0.1667	1	0.0794	0.2698	0.0079	0.0794
	Wilcoxon vs. Grp 10 : CO92 ∆yscN x2 (Day 90)	0.0159	0.0159	0.2063	0.8492	0.1429	0.5397	0.0159	0.1111	1
	Wilcoxon vs. Grp 11 : CO92 ∆yscN x1; rF1V (Day 90)	0.0159	0.0159	0.0079	0.0079	0.0159	0.0079	0.0556	0.0079	0.0079	0.0079
	Wilcoxon vs. Grp 12 : CO92 ∆yscN x2 (46 Day); rF1V (Day 90)	0.0159	0.1508	0.3016	1	0.0794	0.2698	0.0079	0.0476	1	1	0.0079
rF1V	n	4	4	5	5	5	5	5	5	5	5	5	5
	Median (Min, Max)	50 ( 50 , 50 )	120,000 ( 80,000 , 160,000 )	160,000 ( 80,000 , 320,000 )	320,000 ( 160,000 , 1,280,000 )	640,000 ( 320,000 , 640,000 )	1,280,000 ( 640,000 , 2,560,000 )	12,800,000 ( 8,533,333 , 51,200,000 )	320,000 ( 160,000 , 640,000 )	320,000 ( 40,000 , 640,000 )	80,000 ( 80,000 , 640,000 )	12,800,000 ( 5,120,000 , 25,600,000 )	1,066,667 ( 160,000 , 2,133,333 )
	GEO Mean (GSE)	50 ( 1.00 )	113,137 ( 1.22 )	183,792 ( 1.30 )	320,000 ( 1.46 )	485,029 ( 1.19 )	1,114,305 ( 1.30 )	14,039,360 ( 1.40 )	367,583 ( 1.30 )	211,121 ( 1.60 )	139,288 ( 1.50 )	12,241,312 ( 1.40 )	769,936 ( 1.54 )
	Wilcoxon vs. Grp 2 : CO92 pgm-pPst- x1	0.0286
	Wilcoxon vs. Grp 3 : CO92 pgm-pPst- x2 (21 Day)	0.0159	0.3016
	Wilcoxon vs. Grp 4 : CO92 pgm-pPst- x2 (46 Day)	0.0079	0.0794	0.4841
	Wilcoxon vs. Grp 5 : CO92 pgm-pPst- x2 (90 Day)	0.0079	0.0079	0.0476	0.2381
	Wilcoxon vs. Grp 6 : CO92 pgm-pPst- x2 (46 Day); rF1V (90Day)	0.0079	0.0079	0.0079	0.0556	0.0794
	Wilcoxon vs. Grp 7 : CO92 pgm-pPst- x1; F1V (Day 90)	0.0079	0.0079	0.0079	0.0079	0.0079	0.0079
	Wilcoxon vs. Grp 8 : CO92 pgm-pPst- x1; CO92 ∆yscN (Day 90)	0.0159	0.0317	0.1905	0.7143	0.6825	0.0476	0.0079
	Wilcoxon vs. Grp 9 : CO92 ∆yscN x2 (Day 45)	0.0159	0.2381	0.7302	0.8492	0.2381	0.0238	0.0079	0.5317
	Wilcoxon vs. Grp 10 : CO92 ∆yscN x2 (Day 90)	0.0079	1	0.4762	0.119	0.0556	0.0238	0.0079	0.1429	0.5079
	Wilcoxon vs. Grp 11 : CO92 ∆yscN x1; rF1V (Day 90)	0.0159	0.0159	0.0079	0.0079	0.0079	0.0079	0.8254	0.0079	0.0079	0.0079
	Wilcoxon vs. Grp 12 : CO92 ∆yscN x2 (46 Day); rF1V (Day 90)	0.0159	0.0317	0.0556	0.2698	0.2381	0.7063	0.0079	0.1905	0.0952	0.0397	0.0079
Y. pestis TS C12	n	4	4	5	5	5	5	5	5	5	5	5	5
	Median (Min, Max)	67 ( 50 , 200 )	5,333 ( 1,333 , 17,067 )	80,000 ( 20,000 , 80,000 )	80,000 ( 20,000 , 320,000 )	266,667 ( 106,667 , 640,000 )	66,667 ( 40,000 , 320,000 )	12,800 ( 1,600 , 34,133 )	320,000 ( 160,000 , 640,000 )	80,000 ( 12,800 , 213,333 )	160,000 ( 80,000 , 320,000 )	8,533 ( 1,600 , 51,200 )	80,000 ( 4,267 , 160,000 )
	GEO Mean (GSE)	79 ( 1.39 )	4,795 ( 1.68 )	55,277 ( 1.31 )	87,746 ( 1.77 )	242,515 ( 1.37 )	76,387 ( 1.47 )	9,701 ( 1.64 )	320,000 ( 1.25 )	73,169 ( 1.67 )	152,775 ( 1.33 )	8,844 ( 1.75 )	44,012 ( 1.89 )
	Wilcoxon vs. Grp 2 : CO92 pgm-pPst- x1	0.0286
	Wilcoxon vs. Grp 3 : CO92 pgm-pPst- x2 (21 Day)	0.0159	0.0159
	Wilcoxon vs. Grp 4 : CO92 pgm-pPst- x2 (46 Day)	0.0159	0.0159	0.6587
	Wilcoxon vs. Grp 5 : CO92 pgm-pPst- x2 (90 Day)	0.0159	0.0159	0.0079	0.3175
	Wilcoxon vs. Grp 6 : CO92 pgm-pPst- x2 (46 Day); rF1V (90Day)	0.0079	0.0079	1	1	0.0635
	Wilcoxon vs. Grp 7 : CO92 pgm-pPst- x1; F1V (Day 90)	0.0159	0.4127	0.0159	0.0238	0.0079	0.0079
	Wilcoxon vs. Grp 8 : CO92 pgm-pPst- x1; CO92 ∆yscN (Day 90)	0.0159	0.0159	0.0079	0.127	0.4921	0.0397	0.0079
	Wilcoxon vs. Grp 9 : CO92 ∆yscN x2 (Day 45)	0.0159	0.0317	0.6508	0.754	0.0873	0.9048	0.0317	0.0238
	Wilcoxon vs. Grp 10 : CO92 ∆yscN x2 (Day 90)	0.0079	0.0079	0.0794	0.7381	0.3571	0.1667	0.0079	0.1032	0.2778
	Wilcoxon vs. Grp 11 : CO92 ∆yscN x1; rF1V (Day 90)	0.0159	0.381	0.0317	0.0317	0.0079	0.0317	0.7381	0.0079	0.0397	0.0079
	Wilcoxon vs. Grp 12 : CO92 ∆yscN x2 (46 Day); rF1V (Day 90)	0.0159	0.0952	1	0.6587	0.0238	1	0.1032	0.0159	0.4841	0.1349	0.1349
rV	n	4	4	5	5	5	5	5	5	5	5	5	4
	Median (Min, Max)	50 ( 50 , 133 )	467 ( 200 , 533 )	800 ( 100 , 25,600 )	2,667 ( 400 , 3,200 )	3,733 ( 1,600 , 6,400 )	273,067 ( 136,533 , 546,133 )	204,800 ( 102,400 , 409,600 )	1,333 ( 400 , 2,133 )	1,067 ( 100 , 4,267 )	667 ( 200 , 800 )	136,533 ( 21,333 , 341,333 )	204,800 ( 68,267 , 819,200 )
	Median (Q1, Q3)	50 ( 50 , 92 )	467 ( 300 , 533 )	800 ( 200 , 2,667 )	2,667 ( 800 , 3,200 )	3,733 ( 3,200 , 5,333 )	273,067 ( 204,800 , 409,600 )	204,800 ( 136,533 , 204,800 )	1,333 ( 800 , 1,600 )	1,067 ( 267 , 2,667 )	667 ( 533 , 667 )	136,533 ( 68,267 , 273,067 )	204,800 ( 136,533 , 512,000 )
	GEO Mean (GSE)	63 ( 1.26 )	378 ( 1.24 )	919 ( 2.63 )	1,528 ( 1.53 )	3,510 ( 1.27 )	270,235 ( 1.28 )	186,721 ( 1.27 )	1,008 ( 1.31 )	764 ( 2.00 )	504 ( 1.27 )	107,243 ( 1.65 )	204,800 ( 1.60 )
	Wilcoxon vs. Grp 2 : CO92 pgm-pPst- x1	0.0286
	Wilcoxon vs. Grp 3 : CO92 pgm-pPst- x2 (21 Day)	0.0317	0.6111
	Wilcoxon vs. Grp 4 : CO92 pgm-pPst- x2 (46 Day)	0.0159	0.0794	0.4286
	Wilcoxon vs. Grp 5 : CO92 pgm-pPst- x2 (90 Day)	0.0159	0.0159	0.2063	0.1429
	Wilcoxon vs. Grp 6 : CO92 pgm-pPst- x2 (46 Day); rF1V (90Day)	0.0159	0.0159	0.0079	0.0079	0.0079
	Wilcoxon vs. Grp 7 : CO92 pgm-pPst- x1; F1V (Day 90)	0.0159	0.0159	0.0079	0.0079	0.0079	0.3254
	Wilcoxon vs. Grp 8 : CO92 pgm-pPst- x1; CO92 ∆yscN (Day 90)	0.0159	0.0635	0.7302	0.3651	0.0159	0.0079	0.0079
	Wilcoxon vs. Grp 9 : CO92 ∆yscN x2 (Day 45)	0.0317	0.5079	0.8968	0.5794	0.0873	0.0079	0.0079	0.9683
	Wilcoxon vs. Grp 10 : CO92 ∆yscN x2 (Day 90)	0.0159	0.2063	0.6429	0.0952	0.0079	0.0079	0.0079	0.1111	0.5238
	Wilcoxon vs. Grp 11 : CO92 ∆yscN x1; rF1V (Day 90)	0.0159	0.0159	0.0159	0.0079	0.0079	0.2143	0.5714	0.0079	0.0079	0.0079
	Wilcoxon vs. Grp 12 : CO92 ∆yscN x2 (46 Day); rF1V (Day 90)	0.0286	0.0286	0.0159	0.0079	0.0159	0.7222	0.881	0.0159	0.0159	0.0159	0.6111
